# Supplementary material for: A Novel Strategy for Decoding and Validating the Combination Principles of Huanglian Jiedu Decoction From Multi-Scale Perspective
Source: Front Pharmacol. 2020 Dec 4;11:567088. doi: 10.3389/fphar.2020.567088 (PMC7789881; doi:10.3389/fphar.2020.567088)
Supplement: Supplementary file 1 [file table1.xlsx]

## Sheet: AD
pathogenic genes	relevance scores
APP	160.64
MAPT	110.73
SNCA	88.44
TNF	85.97
IL1B	67.37
NOS3	61.28
BCHE	60.75
CHAT	58.79
TTR	52.21
MPO	51.17
PPARG	50.36
BACE1	49.86
MT-ND1	49.2
LDLR	48.82
GBA	48.44
UCHL1	48.41
ACHE	47.28
TNFRSF1A	46.33
MT-ND2	45.49
CTSB	42.7
SLC6A3	41.88
CHRNA7	41.27
GSK3B	41.12
VLDLR	41.02
DYRK1A	40.82
IL6	40.56
CAPN1	38.86
CDK5	37.75
SLC18A3	35.17
PTGS2	34.91
LRP8	34.5
HTR2A	34.44
IDE	34.09
DRD2	32.5
CYP2D6	31.49
MAOB	30.54
BACE2	30.4
CDK5R1	30.34
COMT	30.11
AKT1	29.54
PIN1	29.44
NOS1	27.1
SLC6A4	26.59
GSK3A	25.57
PTGS1	25.51
VEGFA	25.24
NDUFS4	25.19
MAPK8	25.02
F2	24.97
NQO1	24.97
CREB1	24.28
TLR4	23.05
SPHK2	22.32
PON1	22.2
MAOA	21.23
ATP2A2	21.15
SLC2A1	21.04
DRD3	20.78
CAPN2	20.59
ESR1	20.56
DBH	20.23
APAF1	20.17
NAE1	20.02
EGFR	19.56
MMP9	19.53
CXCL8	19.52
TLR2	19.1
DRD4	19.05
ERN1	18.83
STAT3	18.71
VDR	18.58
EDNRB	18.48
ERBB2	18.41
ERBB4	18.39
KRAS	17.95
MMP3	17.93
MMP2	17.32
ABCB1	17.01
NOS2	16.87
NR4A2	16.51
IL2	16.47
MMP1	16.28
BCL2	15.69
IGF1R	15.38
AR	14.97
NLRP3	14.73
NR3C1	14.72
DRD5	14.55
PIK3CA	14.49
ELANE	14.35
CYP19A1	14.31
INSR	14.25
G6PD	13.97
CHRNA4	13.94
NFKB1	13.88
CNR1	13.68
DNM2	13.42
HMGCR	13.36
NDUFV2	13.28
TERT	13.25
GSTM1	13.23
SELP	13.21
ESR2	13
HTR1A	12.95
SLC6A2	12.92
PIK3R1	12.84
DRD1	12.72
CCND1	12.59
SRC	12.53
PLG	12.32
MIF	12.25
CCR6	12.07
PLA2G4A	12.06
NLRP1	12.01
JUN	11.87
SMAD3	11.87
NFE2L2	11.85
MMP13	11.7
NR3C2	11.65
LPA	11.56
CREBBP	11.48
STAT1	11.47
RBP4	11.4
MLYCD	11.33
XDH	11.29
HIF1A	11.15
CD4	10.97
FGF2	10.94
CYP27A1	10.92
CYP17A1	10.88
ADORA2A	10.82
MT-ND4	10.73
MAPK14	10.72
NDUFS3	10.67
MAPK10	10.63
GPT	10.62
PRKCD	10.57
PPARA	10.5
SPTLC1	10.45
ASAH1	10.44
FOLH1	10.42
TNNI3	10.38
HTR2C	10.19
ALOX5	10.18
F3	10.17
PRTN3	10.15
CDK4	10.13
MT-ND5	9.94
MET	9.93
NDUFS2	9.73
ERBB3	9.66
ALDH2	9.64
PTPRC	9.63
KDR	9.48
GLB1	9.43
EDNRA	9.38
SLC6A1	9.36
PLA2G2A	9.35
TLR9	9.29
HNF4A	9.24
FYN	9.22
FGB	9.22
CA2	9.14
PLCG2	9.04
FOS	8.92
ABCG2	8.91
PRKCG	8.91
ADH1C	8.88
EP300	8.87
TNNT2	8.87
NR1H2	8.81
RELA	8.81
MMP12	8.8
HSPA5	8.72
GSR	8.66
PARP1	8.6
NR1H4	8.56
CYP1A2	8.54
HSP90AA1	8.54
MT-ND6	8.44
SHBG	8.42
LRP6	8.42
LCN2	8.41
RARB	8.4
SIGMAR1	8.4
GRIK2	8.4
CTSK	8.38
ATP1A3	8.38
LDHA	8.37
CYP1A1	8.36
NR1H3	8.35
TYR	8.29
TCF4	8.29
CHRM1	8.25
NDUFV1	8.21
AHR	8.18
FTO	7.95
ATP1A1	7.93
SLC10A2	7.92
PRKCA	7.91
GUSB	7.89
NDUFS1	7.88
BCL2L1	7.86
THRB	7.83
MT-ND3	7.83
DNM1	7.71
CPT2	7.67
ABCB11	7.62
HDAC6	7.61
MITF	7.56
TUBB3	7.51
CDK1	7.49
SELL	7.46
CALM1	7.44
RARA	7.43
HDAC9	7.33
PRKCQ	7.3
RIPK1	7.3
HSPA1A	7.27
DAPK1	7.26
CSNK2A1	7.24
NDUFA12	7.24
CXCR2	7.19
PGR	7.16
GABRB1	7.14
PRKCB	7.08
SLC6A9	7.04
TPMT	7.01
CYP2C19	7
CHRNA2	6.92
CYP2C9	6.9
FGF1	6.88
NDUFA10	6.87
PLAUR	6.85
EPHX1	6.83
HSD11B1	6.81
PRSS1	6.78
DMPK	6.76
ADH1B	6.71
APEX1	6.71
ODC1	6.65
FABP3	6.6
THRA	6.6
HTR1B	6.59
GABBR1	6.52
ALDH1A1	6.51
NDUFA6	6.51
NDUFA13	6.49
GC	6.43
SPTLC2	6.39
NDUFS7	6.39
RHOA	6.36
CDK2	6.34
HRH3	6.34
NDUFB9	6.34
EPHB2	6.29
EPHX2	6.29
NDUFB3	6.29
PIK3CG	6.28
NDUFB8	6.27
HDAC2	6.21
HTR7	6.2
ATP2A1	6.2
CTSG	6.2
NDUFS8	6.19
MT-ND4L	6.16
MCL1	6.14
PTPN1	6.14
CHRM3	6.13
NDUFA9	6.11
ABCC2	6.1
CYP3A4	6.06
ALOX15	6.05
RORA	6.03
IKBKB	6.03
CHUK	6.01
NDUFB11	5.99
LCT	5.98
PDK3	5.97
PPARD	5.96
NDUFA1	5.96
SRD5A2	5.94
SREBF1	5.94
CDK6	5.93
NDUFA2	5.9
NDUFS6	5.88
MB	5.87
CHRNA3	5.84
EPHA4	5.82
OPRM1	5.81
CNR2	5.8
CTSH	5.79
KCNMA1	5.77
ACP1	5.75
FUCA1	5.74
GBA2	5.73
ALOX12	5.7
PTK2	5.69
GRK1	5.69
AKR1B1	5.67
TBXAS1	5.66
CD81	5.64
ACE2	5.59
CAMK2A	5.56
LGALS3	5.55
EPHA1	5.46
ADRA2B	5.43
HDAC4	5.38
FDPS	5.34
CHRM2	5.32
P4HB	5.27
NOX1	5.27
TOP1	5.24
CAMK2G	5.23
SLC8A1	5.22
GLI1	5.21
NDUFA4	5.19
ADRA2A	5.18
PTGER4	5.18
PRKCE	5.18
PLCG1	5.17
TDO2	5.16
SERPINA6	5.14
CDC25A	5.11
SLC25A20	5.11
MDH2	5.07
GLO1	5.04
CDC25B	4.97
KCNA2	4.95
TUBA4A	4.87
CDC25C	4.85
GNAO1	4.82
RXRA	4.78
AKR1A1	4.77
CCNB1	4.77
CYP2A6	4.76
ST6GAL1	4.74
KCNN4	4.71
ELAVL1	4.7
CHRNA5	4.68
NSD2	4.68
NDUFA11	4.67
PHGDH	4.65
EED	4.59
ADORA1	4.58
PRKCH	4.56
STAT2	4.55
EPHA2	4.54
ANPEP	4.51
HDAC1	4.45
UGCG	4.45
LCK	4.43
SREBF2	4.42
OPRL1	4.39
OPRK1	4.36
SRD5A1	4.36
FAAH	4.34
PRKDC	4.29
OPRD1	4.27
CES1	4.24
CYP2C8	4.23
POLB	4.21
PTGER2	4.21
SLCO2A1	4.19
KCNN1	4.18
KAT5	4.16
TACR1	4.14
ABCC1	4.12
CSNK1A1L	4.11
CA4	4.1
CA9	4.09
NQO2	4.07
CCNA2	4.05
PTGER3	4.02
EBP	4.01
AZU1	4.01
TBXA2R	3.94
CMA1	3.94
SPHK1	3.93
ENPP2	3.9
CTSS	3.9
CAMK4	3.88
MTNR1A	3.88
TNNC1	3.86
RXRB	3.83
CREM	3.83
MTNR1B	3.83
ATP12A	3.82
QDPR	3.8
NR4A1	3.8
KYNU	3.76
CDC45	3.75
CA12	3.74
MPI	3.73
PIP5K1C	3.69
FABP12	3.67
GNAI1	3.67
ADRA1A	3.66
HCK	3.66
SLC5A2	3.62
MAK	3.61
ACPP	3.57
FEN1	3.55
KCNB1	3.52
SLC5A1	3.51
ST3GAL3	3.5
NDUFAB1	3.49
NDUFA5	3.48
ADRA2C	3.46
TACR2	3.45
LTB4R	3.44
ABCC4	3.43
XPO1	3.43
CSNK2A2	3.42
PDCD4	3.42
HIF1AN	3.4
S1PR1	3.37
NDUFA8	3.36
VRK2	3.36
KCNA4	3.35
ICK	3.35
KLF5	3.31
NDUFB10	3.31
PTGIR	3.26
NDUFS5	3.26
HDAC5	3.24
NDUFA7	3.24
POLH	3.22
LPAR1	3.2
PTGFR	3.2
KDM1A	3.19
PLA2G2D	3.16
S1PR2	3.14
GPT2	3.13
MBNL1	3.13
DNM3	3.11
ALDH1A2	3.09
NDUFB6	3.09
PTPN6	3.08
SOAT2	3.06
NDUFC2	3.06
PHF8	3
SMPD2	3
CTBP2	2.97
CHRFAM7A	2.95
NCOR1	2.94
GNAI3	2.93
CHRM4	2.92
ESRRB	2.92
KCNA3	2.92
PTPRF	2.91
PIK3CB	2.9
MAPK9	2.89
GRIK1	2.88
LAP3	2.88
FABP7	2.87
AURKB	2.86
NDUFB7	2.84
MAPK11	2.83
NDUFA3	2.8
RXRG	2.78
PKN1	2.77
PTPRD	2.74
CA1	2.73
HDAC3	2.73
RARG	2.72
NDUFB5	2.72
NUAK1	2.71
PDE1A	2.7
GSTA1	2.69
KCNN2	2.68
FDFT1	2.68
TUBB1	2.68
ADORA2B	2.68
MDH1	2.66
NDUFB1	2.65
GPBAR1	2.63
FABP5	2.62
CYP51A1	2.6
POLL	2.59
CDK18	2.59
CBR1	2.57
KMO	2.57
SIRT5	2.57
NAAA	2.56
KLK2	2.55
NDUFV3	2.55
RPS6KB2	2.54
RBBP4	2.51
FRK	2.5
AOX1	2.49
CHRNA6	2.45
NDUFC1	2.45
ATIC	2.44
PTPN13	2.44
ICMT	2.42
CISD1	2.4
NDUFB4	2.37
CBR3	2.34
CCNK	2.3
AKR1C4	2.27
ENPEP	2.26
FGR	2.24
TNKS2	2.23
HKDC1	2.23
DUSP22	2.21
ADH1A	2.15
P4HA1	2.15
LIG1	2.13
CDK9	2.1
IMPDH2	2.1
PIM1	2.06
S1PR3	2.06
PTPRS	2.03
RNPEP	2.02
NDUFA4L2	2.02
PGD	2.01
SLC7A11	2.01
ATF1	1.95
JUNB	1.92
NDUFB2	1.92
AKR1B10	1.9
JUND	1.9
LGALS8	1.9
BCL2L2	1.89
CCNE2	1.88
POLI	1.85
SENP7	1.85
AKR1C1	1.82
SLC5A4	1.82
CA5A	1.78
SENP1	1.78
CHRNB3	1.77
CA6	1.75
HSD11B1L	1.75
HDAC10	1.74
MGLL	1.72
LPAR3	1.71
RPS6KA2	1.69
GRK6	1.68
GGPS1	1.67
DUSP3	1.65
CDK17	1.65
TRPM2	1.65
ACLY	1.64
BAZ2A	1.59
SLC22A1	1.57
MPG	1.54
SLCO2B1	1.41
SLC22A6	1.29
GSTK1	1.28
PAFAH1B2	1.27
AKR1E2	1.26
S1PR5	1.16
APOBEC3A	1.15
NMUR2	1.14
CSNK2A3	1.1
SENP2	1.09
PDE1B	1.04
CDK3	0.97
STK17B	0.97
PPME1	0.96
CAMKK1	0.93
CA14	0.92
PLA2G4C	0.89
GLB1L	0.85
PIN4	0.79
CA7	0.77
CDK15	0.76
PTPN7	0.72
CHRM5	0.69
PARP10	0.69
ULK2	0.68
PARP15	0.67

## Sheet: DM
pathogenic genes	relevance scores
INSR	107.85
HNF4A	105.48
PPARG	76.62
AVPR2	69.71
IL6	58.17
VEGFA	57.61
PON1	53.37
NOS3	48.61
MT-ND1	44.07
AKR1B1	41.36
PIK3R1	41.22
AKT1	39.93
TNF	38.25
MTNR1B	38.11
STAT3	37.8
SLC2A1	35.15
IGF1R	33.21
SLC5A2	31.74
MT-ND2	30.35
PTPN1	29.32
LDLR	27.98
PPARA	26.11
SHBG	25.96
IL1B	25.95
LPA	25.18
RBP4	24.63
CPT2	23.99
IDE	23.2
GPT	22.65
HMGCR	21.76
SELP	21.64
VDR	21.62
MAPK8	21.45
PIK3CG	20.48
TLR4	20.02
MT-ND6	19.83
MT-ND4	19.74
FABP2	19.63
NOS2	19.44
ACP1	19.25
GSK3B	19.11
FGF2	18.96
TCF4	18.94
SLC12A1	18.91
MAPK14	18.89
PRKCB	18.73
CNR1	18.73
PPARD	18.49
FABP4	18.22
CXCL8	18.1
MT-ND5	18.07
FTO	17.95
LCN2	17.88
AR	17.72
MMP9	17.52
STAT1	17.47
NR1H2	17.22
HSD11B1	16.94
SREBF1	16.74
IKBKB	16.27
CYP19A1	16.04
PRSS1	16.01
F2	15.73
PIK3CA	15.62
IL2	15.56
NR3C1	15.51
NR3C2	14.91
GFPT1	14.81
HSD11B2	14.55
HKDC1	14.4
NR1H4	14.04
SHH	13.79
PARP1	13.77
SI	13.63
PDK4	13.49
MAPK10	13.38
SLC5A4	13.31
GLI2	13.14
PRKCD	13.13
PGF	13.1
KDR	12.85
G6PD	12.8
FOS	12.5
DMPK	12.33
PTPRF	12.32
SLC5A1	12.15
KRAS	12
MMP2	11.92
F3	11.85
GPR35	11.34
HSPA5	11.3
PRTN3	11.21
TERT	10.88
NFE2L2	10.75
PTGS2	10.74
GLO1	10.71
COMT	10.45
ESR1	10.3
IMPDH1	10.29
TTR	10.26
CDK4	10.04
MPO	9.87
CPA1	9.8
NFKB1	9.74
GSTM1	9.69
CA4	9.63
MAK	9.62
LDHA	9.52
CISD1	9.42
AHR	9.39
MT-ND3	9.3
HIF1A	9.3
KCNA2	9.29
MAPT	9.22
TRPV1	9.01
JUN	8.96
SMAD3	8.77
NEK2	8.6
MET	8.59
CD4	8.47
EGFR	8.43
TLR2	8.41
FABP1	8.13
PTPN2	8.08
XDH	7.91
CYP2C19	7.83
ACE2	7.82
ALDH2	7.78
NOS1	7.74
EP300	7.66
OXER1	7.6
CYP3A4	7.5
MMP1	7.41
ABCB4	7.39
PTGS1	7.36
CELA1	7.33
ACHE	7.26
CCND1	7.26
CYP17A1	7.14
DRD5	7.11
PRKCA	7.08
CHAT	7.03
TNFRSF1A	6.99
DNM1	6.97
ELANE	6.95
ADRA2A	6.9
CREB1	6.85
EDNRA	6.82
NLRP3	6.76
NOX1	6.72
GHSR	6.64
CYP2C9	6.59
SNCA	6.57
MIF	6.48
HTR1A	6.41
PIK3CB	6.29
HTR2C	6.28
GC	6.19
SLC6A4	6.19
KDM4C	6.18
CYP27B1	6.16
NOX4	6.12
RHOA	6.1
CTSB	6.02
ABCB1	6.01
DRD2	5.98
NR1H3	5.97
SLC6A14	5.95
BCHE	5.93
SELL	5.92
CTSG	5.9
BCL2	5.89
PLG	5.89
CDK6	5.77
CYP24A1	5.77
NLRP1	5.75
MLNR	5.67
LRP6	5.62
CDK2	5.61
AKR1B10	5.56
EDNRB	5.56
ALOX12	5.54
PRKCG	5.5
HSPA1A	5.35
SRD5A1	5.35
PLCG1	5.31
SREBF2	5.31
APP	5.24
TNNT2	5.21
TLR9	5.2
SLC22A3	5.18
MMP3	5.11
ESR2	5.08
GSR	5.06
SRC	5.05
NDUFAF2	5.04
LGALS3	5.01
NQO1	4.99
CYP1A2	4.98
DRD4	4.97
OPRM1	4.94
KCND3	4.94
FFAR1	4.94
NDUFS1	4.93
HDAC6	4.92
ESRRA	4.9
FEN1	4.88
RELA	4.85
CA2	4.83
CMA1	4.83
HTR2A	4.81
THRB	4.81
ABCG2	4.78
PIK3CD	4.77
LCT	4.75
FGF1	4.73
MB	4.73
ERBB2	4.69
FAAH	4.63
RXRA	4.62
ERBB3	4.61
KCNMA1	4.61
MAOA	4.6
SLC16A1	4.6
BCL2L1	4.58
HSP90AA1	4.56
CYP1A1	4.53
NDUFS2	4.44
CYP2D6	4.43
CNR2	4.42
NDUFS4	4.4
ADRA2B	4.38
CCR6	4.37
GLI1	4.37
LAP3	4.35
BHMT	4.3
FABP5	4.27
MMP10	4.24
ANPEP	4.23
GPBAR1	4.16
ADH1B	4.15
ABCC1	4.14
MAPK9	4.14
MCL1	4.12
GPR174	4.09
CREM	4.06
GSK3A	4.06
DBH	4.04
MAOB	4.03
TNNI3	4.03
FGB	4
PIM1	3.97
EPHX2	3.97
PLA2G2A	3.86
RARB	3.84
CCR4	3.83
SERPINA6	3.8
CHRM3	3.79
PRKCE	3.77
LIG1	3.75
CTSH	3.71
CHUK	3.71
RPA1	3.7
PTPRD	3.67
ATP4A	3.64
ALOX5	3.63
APEX1	3.62
ATP2A1	3.61
ATP1A3	3.6
NDUFA13	3.6
AMY2A	3.59
NOD1	3.58
RXRG	3.57
RARA	3.56
PTPRC	3.52
MAPK11	3.52
KCNN4	3.49
NDUFV1	3.48
ATP6V1B1	3.46
AKR1A1	3.45
RXRB	3.44
ABCC2	3.42
NDUFV2	3.42
TACR1	3.42
SLC9A1	3.4
PDCD4	3.39
PRKCQ	3.37
TBXA2R	3.37
DRD3	3.34
CYP2C8	3.29
SLC6A2	3.28
IKBKG	3.25
FABP3	3.22
SLC22A1	3.22
LGALS1	3.21
BACE1	3.19
ADH1C	3.18
PRKDC	3.18
ABCC4	3.11
CA9	3.09
GBA	3.09
LSS	3.09
ADORA2B	3.06
RORA	3.06
ERBB4	3.05
POLB	3.02
MBNL1	3.01
NDUFB9	3.01
SRD5A2	2.98
ENPP2	2.97
FOLH1	2.97
PRKCH	2.92
ABCB11	2.91
HDAC9	2.9
ACVR2A	2.89
GLI3	2.87
STAT4	2.86
SLC15A1	2.83
FABP12	2.82
DRD1	2.8
CES1	2.79
SLC8A1	2.79
KCNA1	2.77
CCNB1	2.77
ATP12A	2.75
AURKB	2.75
CYP1B1	2.74
GNAI1	2.74
PLAUR	2.74
SLC22A11	2.74
HTR1B	2.72
FUCA1	2.72
SLC25A20	2.72
SPTLC1	2.72
CAMK2G	2.7
ATP1A2	2.69
ATP2A2	2.69
ESRRB	2.67
EPHX1	2.64
ABCC3	2.64
NDUFS7	2.58
NDUFA11	2.58
SPHK1	2.57
BACE2	2.57
JUND	2.55
CCNA2	2.52
EPAS1	2.52
PTK2	2.51
DPYD	2.51
HTR2B	2.48
NMUR2	2.46
ST6GAL1	2.46
POLA1	2.46
GNB1	2.46
NDUFAF1	2.46
NDUFAF3	2.46
NDUFAF4	2.46
NDUFS3	2.46
NDUFS8	2.46
NDUFA1	2.46
NDUFA6	2.46
NDUFB10	2.46
NDUFB11	2.46
NDUFB3	2.46
NDUFS6	2.46
SLC5A10	2.46
FLT3	2.45
CXCR1	2.4
KLF5	2.4
IMPDH2	2.37
NR0B1	2.37
ADORA2A	2.36
PLA2G4A	2.36
TBXAS1	2.36
MDH1	2.34
CTSK	2.33
NDUFB6	2.33
AXL	2.3
NPC1L1	2.29
PLCG2	2.29
CDK5	2.28
KLK2	2.28
PTGER4	2.28
MMP12	2.28
PTGFR	2.26
L3MBTL3	2.25
ERN1	2.22
CAPN2	2.21
MT-ND4L	2.2
HPGDS	2.19
ATP1A1	2.17
SLC22A6	2.17
TRPM2	2.17
CD81	2.17
ALOX15	2.14
ACLY	2.13
CAPN1	2.11
PGR	2.11
CA1	2.09
MTNR1A	2.07
PYGL	2.01
HDAC4	2.01
KCNK2	1.99
DNM2	1.98
LPAR3	1.98
LCK	1.94
ERAP1	1.93
CDC25C	1.92
DYRK1A	1.92
HDAC3	1.91
SLC6A3	1.91
NR4A1	1.89
PGD	1.88
PAM	1.87
SLC12A5	1.86
ALDH1A1	1.85
KCNA10	1.84
NSD2	1.83
ELAVL1	1.82
AOX1	1.82
CTSS	1.82
MGLL	1.82
FABP6	1.82
NR4A2	1.81
SLC10A2	1.8
ALDH1A2	1.78
TRPV4	1.78
HCAR2	1.75
PTPN6	1.75
TYR	1.74
SLC10A1	1.74
XPO1	1.74
STAT2	1.73
ADORA1	1.72
GUSB	1.71
PTGIR	1.7
FFAR4	1.67
S1PR1	1.67
GPT2	1.67
STS	1.65
ADRA2C	1.64
KCNA3	1.64
DHODH	1.63
APAF1	1.62
KDM1A	1.62
SOAT2	1.62
ALDH1B1	1.6
AKR1C3	1.6
ENPEP	1.6
NDUFB8	1.6
RDH8	1.6
PTGER3	1.57
KCNK9	1.56
ACVR2B	1.54
PARP15	1.54
HDAC2	1.53
PLA2G1B	1.51
LRP8	1.51
ODC1	1.51
UCHL1	1.51
PTAFR	1.49
MDH2	1.49
S1PR3	1.49
CSNK2A2	1.47
SLC5A11	1.47
LPAR1	1.46
ATIC	1.45
GABBR1	1.45
HDAC7	1.45
ACPP	1.43
SPTLC2	1.43
MMP13	1.41
CYP4F2	1.41
LTA4H	1.41
MITF	1.4
KAT5	1.4
ATP1A4	1.38
NDUFC2	1.38
MMP26	1.37
ADRA1A	1.36
HTR5A	1.35
CYP51A1	1.35
TPMT	1.35
PDE10A	1.35
AZU1	1.31
P4HB	1.3
GSTK1	1.29
VLDLR	1.29
CYP2A6	1.29
CA6	1.28
CAMK2D	1.28
ALPI	1.27
RARG	1.26
PHGDH	1.25
KCNB1	1.25
SLC6A5	1.25
TDP1	1.23
CDK5R1	1.23
CDKL5	1.23
CYP26B1	1.23
DSTYK	1.23
GRK1	1.23
NDUFA10	1.23
NDUFA7	1.23
NDUFA8	1.23
NDUFS5	1.23
SENP8	1.23
TDO2	1.23
TACR2	1.23
FDFT1	1.23
HDAC5	1.21
MLYCD	1.21
NCOR1	1.21
PTGER2	1.21
THRA	1.21
ADRA1D	1.21
ALK	1.18
CBR1	1.18
PIN1	1.18
RIPK1	1.18
ADRA1B	1.18
SLC37A4	1.16
LGALS9	1.16
NDUFA5	1.16
PGA5	1.16
FGR	1.16
CSNK2A1	1.14
CYP27A1	1.14
TUBB3	1.14
UGT2B7	1.14
CES2	1.13
GNG2	1.13
GRIK2	1.13
TAS2R9	1.13
CBR3	1.12
GSTA1	1.12
PAOX	1.12
ADH1A	1.1
CXCR2	1.1
EPHA1	1.1
EPHB2	1.1
PLA2G10	1.1
SQLE	1.1
HSD17B1	1.08
ACVR1	1.08
CALM1	1.08
GLB1	1.08
S1PR2	1.08
POLI	1.06
SLC16A3	1.06
ADORA3	1.05
ADH7	1.05
SMPD2	1.05
FYN	1.05
PTPRS	1.03
ASAH1	1.03
KCNK3	1
CA3	0.99
CHRM2	0.99
DAPK1	0.99
GRK6	0.99
PKN1	0.99
RNPEP	0.99
GGPS1	0.99
HCAR3	0.99
PLA2G4C	0.99
PLA2G5	0.99
RORC	0.99
RBBP4	0.99
VAV1	0.99
SLC16A7	0.97
SLC7A5	0.97
CHRM1	0.96
CHRM5	0.96
OPRD1	0.96
KCNA5	0.96
ATF1	0.96
BCL2L2	0.96
CTDSP1	0.96
CYSLTR1	0.96
TOP2B	0.96
EPHA7	0.96
HDAC10	0.96
HDAC8	0.96
KLK5	0.96
MMP15	0.96
PLA2G4B	0.96
RNASEH1	0.96
CHRNA5	0.96
EZH2	0.96
MMP20	0.96
MMP27	0.96
PDE1A	0.96
PDE1B	0.96
RBBP7	0.96
CREBBP	0.95
GRIK1	0.92
TOP1	0.92
CTSV	0.91
EPHB1	0.91
CTRB1	0.78
GABRR1	0.78
HAO1	0.75
PTPN13	0.75
IHH	0.73
CAMKK1	0.71
HDAC1	0.68
CDK18	0.67
GPR183	0.67
ST3GAL1	0.67
DNM3	0.59
CDK1	0.56
CAMK4	0.56
KAT2B	0.56
BAZ2A	0.55
BAZ2B	0.55
CDK3	0.55
POLK	0.55
POLM	0.55
LGALS8	0.55
KDM4D	0.55
KDM6B	0.55
NAAA	0.55
NDUFB2	0.55
PIM3	0.55
RPS6KA2	0.55
SLC28A3	0.55
ST3GAL3	0.55
SENP2	0.55
TNKS	0.55
TDP2	0.55
UBLCP1	0.55
PHLPP2	0.53
HDAC11	0.52
TUBA4A	0.49
MBNL2	0.46
LPAR2	0.46
NDUFAB1	0.46
FRK	0.46
YES1	0.46
CA7	0.42
CDC25B	0.42
OPRK1	0.42
PAX8	0.42
CTBP2	0.42
LTB4R	0.42
KDM2B	0.42
PARP10	0.42
VRK2	0.42
GFER	0.37
ALOX15B	0.37
CSNK1A1L	0.37
CDK17	0.37
DHH	0.37
EPHB3	0.37
HIF1AN	0.37
KDM4A	0.37
PLA2G2D	0.37
SENP1	0.37
FNTA	0.37
KYNU	0.36
UGCG	0.33
FUT4	0.26
CCNE1	0.23
NEU3	0.23
PIP5K1C	0.23
EPHA2	0.2
SLC5A3	0.2
CHRNA7	0.2
DUSP3	0.2
CAMK2B	0.16
CDC25A	0.16
CRYZ	0.16
GPR50	0.16
KCNA7	0.16
LGALS4	0.16
HRH3	0.16
KMO	0.16
NDUFA3	0.16
NDUFB4	0.16
NDUFB7	0.16
NDUFV3	0.16
PDK3	0.16
RPS6KB2	0.16
SIRT5	0.16
SLC12A2	0.16
PTPN7	0.16
PPM1A	0.16
P2RY14	0.16
CA5A	0.12
NUAK1	0.12
KCNA6	0.12
SIGMAR1	0.12
AKR1C4	0.12
CES3	0.12
CDK14	0.12
CCNE2	0.12
FUT7	0.12
GPR84	0.12
BBOX1	0.12
HSD11B1L	0.12
KLK14	0.12
KDM4B	0.12
SLC18A3	0.12
SPHK2	0.12
S1PR5	0.12
TAS1R1	0.12
TAS2R31	0.12
TAS2R43	0.12
KCNN1	0.12
SUZ12	0.12
NQO2	0.12
